# Supplementary material
Source: publisher site journal article supplement (https://www.kjim.org/upload/media/kjim-2023-263-Supplementary-Table-2.pdf)
Supplement: Supplementary file 1 [file kjim-2023-263-Supplementary-Table-2.pdf]

**Supplementary Table 2. Definitions of adverse events**

| Adverse events                        | Definition                                                                                                                                                                                                                                                                                                                                    |
|---------------------------------------|-----------------------------------------------------------------------------------------------------------------------------------------------------------------------------------------------------------------------------------------------------------------------------------------------------------------------------------------------|
| Intraprocedural bleeding              | As overt bleeding from the resection site necessitating on-site endoscopic hemostasis                                                                                                                                                                                                                                                         |
| Postprocedural bleeding               | As hematochezia after the procedure with the following conditions: a decrease in Hb $\geq 2$ g/dL from the baseline, requiring transfusion or endoscopic hemostasis. Postprocedural bleeding was categorized into immediate ( $< 24$ h after resection) or delayed ( $\geq 24$ h after resection) bleeding according to the time of the event |
| Perforation                           | As a transmural defect confirmed during the procedure, or pneumoperitoneum or pneumoretroperitoneum confirmed by the radiologic exam, regardless of the signs of peritonitis                                                                                                                                                                  |
| Post-polypectomy coagulation syndrome | As fever and/or abdominal or pelvic pain without evidence of perforation within 5 days of the procedure.                                                                                                                                                                                                                                      |
